# Supplementary material for: Reaction cascades initiated by nucleophilic attack of heteropentalene mesomeric betaine and nitrogen-rich mesoionic tetrazolium-5-amides on electron-deficient unsaturated compounds. Synthesis of novel heterocyclic systemsElectronic supplementary information (ESI) available: synthesis of 4b; reactions of 11 and 17 with electron-deficient unsaturated compounds; alternative synthesis of 19 from 20. See http://www.rsc.org/suppdata/ob/b2/b211000h/
Source: Royal Society of Chemistry journal article supplement (doi:10.1039/b211000h), 2003-02-14
Supplement: b211000h.doc [file b211000h.doc]

Supplementary Material for Organic & Biomolecular Chemistry

This journal is © The Royal Society of Chemistry 2003

# Supplementary data

**Electronic Supplementary Information**

**Reaction cascades initiated by nucleophilic attack of heteropentalene mesomeric betain and nitrogen-rich mesoionic tetrazolium-5-amides to electron-deficient unsaturated compounds. Synthesis of novel heterocyclic systems**

Shuki Araki,* Masashi Kuzuya, Kenji Hamada, Masatoshi Nogura, Nayumi Ohata

*Department of Applied Chemistry, Nagoya Institute of Technology, Gokiso-cho, Showa-ku, Nagoya 466-8555, Japan.*

*E-mail:* [*araki@ach.nitech.ac.jp*](mailto:araki@ach.nitech.ac.jp)*; Fax:* +81-52-735-5206

###### Contents

**1. Synthesis of 3-phenyl-1-(4-tolyl)tetrazolium-5-(4-ethyl)anilide (4b)**

**2. Reactions of 11 and 17 with electron-deficient unsaturated compounds**

**3. Alternative synthesis of 19 from 20**

**1. Synthesis of 3-phenyl-1-(4-tolyl)tetrazolium-5-(4-ethyl)anilide (4b)**

This compound was synthesized in 69% yield from the corresponding chlorotetrazolium salt1 and 4-ethylaniline in a similar manner to **4a**.2 Dark red needles, mp 86 **–** 88 oC (EtOH); IR (KBr) cm-1 1630, 1600, 1504, 1332, 816, 760; 1H NMR (CDCl3) 1.25 (t, *J* = 7.5 Hz, 3H) 2.42 (s, 3H), 2.63 (q, *J* = 7.5 Hz, 2H), 7.15 (d, *J* = 8.5 Hz, 2H), 7.33 (d, *J* = 8.5 Hz, 2H), 7.41 (d, *J* = 8.5 Hz, 2H), 7.52 **–** 7.64 (m, 3H), 8.10 - 8.20 (m, 2H), 8.22 (d, *J* = 8.5 Hz, 2H); 13C NMR (CDCl3) 15.8 (Me), 21.2 (Me), 28.3 (CH2), 120.0 (*o*-C of Ar), 121.2 (*o*-C of Ar), 122.5 (*o*-C of Ar), 127.9 (*m*-C of Ar), 129.5 (*m*-C of Ar), 129.6 (*m*-C of Ar), 131.0 (CH), 132.8, 136.3 (two overlapped signals), 137.9, 146.6, 154.4; MS *m/z* 356 (26%), 355 (100, M+), 340 (14), 105 (11), 91 (49), 77 (61); HRMS *m/z* (M+) calcd 355.1796, obsd 355.1806; UV/Vis (MeCN) max (log )/nm 293.0 (4.48), 445.5 (3.47). Anal. Calcd for C22H21N5 (355.4): C, 74.33; H, 5.97; N, 19.71. Found: C, 74.19; H, 5.84; N, 19.57.

**2. Reactions of 11 and 17 with electron-deficient unsaturated compounds**

**Reaction of 11 with DMAD**

A mixture of **11** (0.20 g, 0.84 mmol) and DMAD (0.20 mL, 1.7 mmol) in toluene (10 mL) was stirred at room temperature for 4 h under argon. Column chromatography (SiO2/hexane-CH2Cl2, then NH-DM 1020/hexane-CH2Cl2 gradient) gave the major product **12a** (0.23 g) and the minor product **12b** (25 mg), together with the recovered **11** (16 mg). Recrystallization from ethanol gave pure **12a** (0.20 g, 64%) and **12b** (22 mg, 6%).

**12a.** Orange crystals, mp 145 **–** 147 oC; IR (KBr) cm-1 1740, 1540, 1496, 1438, 1364, 1143; 1H NMR (CDCl3)**** 3.74 (s, 3H), 3.95 (s, 3H), 6.11 (s, 1H), 7.50 **–** 7.70 (m, 6H), 8.14 **–** 8.20 (m, 4H); 13C NMR (CDCl3) 52.6 (Me), 50.8 (Me), 99.0 (CH), 120.5 (*o*-C of Ph), 122.4 (*o*-C of Ph), 129.8 (*m*-C of Ph), 129.9 (CH), 130.0 (*m*-C of Ph), 132.0 (CH), 134.4, 135.8, 154.4, 156.8, 169.8, 169.0; MS *m/z* 379 (20%, M+), 320 (58), 292 (27), 77 (100); UV/Vis (MeCN)λmax (log )/ nm 228 (4.03), 243 (4.07), 326 (4.52), 395 (3.48). Anal. Calcd for C19H17N5O4 (379.4): C, 60.15; H, 4.52; N, 18.46. Found: C, 60.10; H, 4.54; N, 18.49.

**12b.** Orange crystals; mp 180 **–** 182 oC; IR (KBr) cm-1 1702, 1602, 1580, 1560, 1260, 1164, 1023; 1H NMR (CDCl3) 3.67 (s, 3H), 3.82 (s, 3H), 6.09 (s, 1H), 7.40 **–** 7.60 (m, 6H), 8.00 - 8.10 (m, 2H), 8.27 **–** 8.35 (m, 2H); 13C NMR (CDCl3) 50.9 (Me), 52.3 (Me), 104.2 (CH), 120.2 (*o*-C of Ph), 121.2 (*o*-C of Ph), 129.6 (*m*-C of Ph), 129.9 (*m*-C of Ph), 129.0 (CH), 131.9 (CH), 134.2, 136.0, 150.6, 156.2, 167.0, 166.8; UV/Vis (MeCN) max (log )/ nm 249 (4.26), 271 (4.25), 334 (4.16), 395 (sh, 3.75). Anal. Calcd. for C19H17N5O4 (379.4): C, 60.15; H, 4.52; N, 18.46. Found: C, 59.91; H, 4.34; N, 18.51.

**Reaction of 11 with benzyne**

A solution of tetra(*n*-butyl)ammonium fluoride in THF (1.0 M, 0.16 mL, 0.16 mmol) was added to a mixture of **11** (30 mg, 0.13 mmol) and (phenyl)[2-(trimethylsilyl)phenyl]iodonium triflate (64 mg, 0.13 mmol) in CH2Cl2 (2.0 mL) and the mixture was stirred at room temperature for 30 min. The solvent was removed and the residue dissolved in CH2Cl2 and washed with water. The organic layer was dried (Na2SO4) and the solvent was removed. The residue was purified by column chromatography (NH-DM 1020/CH2Cl2 : hexane = 1 : 1) to give **4a** (13 mg, 32%).

**Reaction of 11 with tetracyanoethylene**

A solution of **11** (0.10 g, 0.42 mmol) and tetracyanoethylene (54 mg, 0.42 mmol) in toluene (5.0 mL) was stirred at room temperature for 2 h. A solid which deposited during the reaction was filtered (0.14 g). Recrystallization from MeCN gave **13** (0.11 g, 78 %); yellow crystals, mp 240 **–** 241 oC (MeCN); IR (KBr) cm-1 2220, 1548, 1510, 1490, 1352, 998, 758, 676; 1H NMR (CDCl3) 7.55 **–** 7.78 (m, 6H), 8.10 **–** 8.30 (m, 4H); MS *m/z* 338 (100%, M+), 312 (6), 178 (8); UV/Vis (MeCN) max (log )/ nm 230 (4.01), 283 (4.15), 377 (4.49). Anal. Calcd. for C18H10N8 (338.3): C, 63.89; H, 2.98; N, 33.13. Found: C, 63.71; H, 3.03; N, 33.37.

**Reaction of 11 and tetrazine 14**

A solution of **11** (0.10 g, 0.42 mmol) and tetrazine **14**3 (83 mg, 0.42 mmol) in CH2Cl2 (3.0 mL) was stirred for 1 h under argon. The reaction mixture was separated by column chromatography (SiO２/CH2Cl2 : EtOAc=10 : 1, then SiO２/EtOAc : hexane=3 : 1) to give **15** (71 mg, 62%; isomer ratio 59 : 29 : 12); orange-red solid, mp 91-95 oC; IR (KBr) cm-1 1740, 1600, 1490, 1204, 1172, 1060, 762; 1H NMR (major isomer) (CDCl3) 3.67 (s, 3H), 3.92 (s, 3H), 7.51-7.67 (m, 7H), 8.04-8.12 (m, 4H); MS *m/z* 407 (4%, M+), 350 (18), 349 (18), 348 (85), 320 (16), 263 (11), 248 (13), 77 (100), 59 (8), 51 (17); UV/Vis (MeCN) max (log )/ nm 293 (sh, 4.16), 338 (4.30). Anal. Calcd for C19H17N7O4•1/2CH2Cl2: C, 52.07; H, 4.02; N, 21.80. Found: C: 52.96, H: 4.15, N: 21.60.

**Reaction of azinobis(1,3-diphenyltetrazolylene) (17) and DMAD**

A mixture of **17** (0.20 g, 0.42 mmol) and DMAD (0.052 mL, 0.42 mmol) in dry CH2Cl2 (10 mL) was stirred for 1 h. The solvent was removed and the residue was chromatographed (NH-DM 1020/CH2Cl2 : hexane = 1:1→CH2Cl2→MeOH) to give **17** (17 mg, 9% recovery), **6a** (41 mg, 21%), **12** (75 : 25 mixture by 1H NMR, total 6 mg, 2%), and **19** (41 mg). Recrystallization from CH2Cl2-hexane gave pure **19** (35 mg, 21%); mp 173 **–** 174 oC; IR (KBr) cm-1 1738, 1700, 1528, 1304, 1196, 1088, 760; 1H NMR (CDCl3)  3.60 (s, 3H), 3.87 (s, 2H), 3.91 (s, 3H), 7.44 **–** 7.64 (m, 6H), 8.20 - 8.31 (m, 4H); 13C NMR (CDCl3) 32.9 (CH2), 51.7 (Me), 52.3 (Me), 120.6 (*o*-C of Ph), 121.7 (*o*-C of Ph), 129.0 (CH), 129.4 (*m*-C of Ph), 129.8 (*m*-C of Ph), 132.0 (CH), 134.3, 135.7, 142.1, 162.7, 165.9, 170.3; MS *m/z* 395 (16%), 394 (64, M+), 363 (10), 362 (16), 335 (25), 320 (12), 105 (11), 77 (100); HRMS *m/z* (M+) calcd 394.1387, obsd 394.1376; UV/Vis (MeCN) max (log )/ nm 254.5 (4.20), 275.5 (4.28), 332.0 (4.52), 423.5 (sh, 3.64). Anal. Calcd for C19H18N6O4 (394.4): C, 57.85; H, 4.61; N, 21.31. Found: C, 57.92; H, 4.68; N, 20.78.

**Reaction of azinobis(1,3-diphenyltetrazolylene) (17) with dibenzoylacetylene**

A solution of **17** (0.10 g, 0.21 mmol) and dibenzoylacetylene4 (0.15 g, 0.63 mmol) in dichloromethane (15 mL) was stirred at room temperature for 7 h. The solvent was removed and the residue was column chromatographed (SiO2/CH2Cl2-MeCN gradient) to give dibenzoylacetylene (42 mg, 28% recovery), crude **21** (19 mg, 19%) and olate **6a** (23 mg, 46%). Recrystallization of the crude **21** from ethanol gave geometrically pure product (14 mg, 14%).

**21.** Orange crystals: mp 162 **–** 165 oC; IR (KBr) cm-1 1680, 1597, 1575, 1520, 1490, 1318, 1293; 1H NMR (CDCl3) ****4.57 (s, 2H), 7.35 **–** 7.64 (m, 12H), 7.96 **–** 8.32 (m, 8H); 13C NMR (50 MHz, CDCl3) ****37.1 (CH2), 120.2 (*o*-C of Ph), 121.8 (*o*-C of Ph), 127.4 (*o*-C of Ph), 128.2 (*o*-C of Ph), 128.4 (*m*-C of Ph), 128.9 (CH), 129.2 (*m*-C of Ph), 129.8 (*m*-C of Ph), 131.4 (CH), 131.6 (*m*-C of Ph), 132.0 (CH), 132.5 (CH), 134.1, 135.8, 137.6, 138.0, 151.6, 162.7, 192.0, 196.7; MS *m/z* 486 (29%, M+), 381 (59), 339, 313, 289, 264, 237, 169, 104, 77 (100), 51. HRMS *m/z* (M+) calcd 486.1807, obsd 486.1850; UV/Vis (MeCN) max (log )/ nm 248 (4.50), 369 (4.43). Anal. Calcd for C29H22N6O2 (486.5): C, 71.59; H, 4.56; N, 17.28. Found C, 71.63; H, 4.66; N, 16.75.

**3. Alternative synthesis of 19 from 20**

A mixture of hydrazide **20**5 (40 mg, 0.16 mmol) and DMAD (0.040 mL, 0.32 mmol) in dry CH2Cl2 (1.5 mL) was stirred for 30 min. The solvent was removed and the residue was chromatographed (NH-DM 1020/CH2Cl2) to give **19** (57 mg, 91%).

**References**

1 S. Araki, K. Yamamoto, M. Yagi, T. Inoue, H. Hattori, H. Yamamura, M. Kawai and Y. Butsugan, Y. *Eur. J. Org. Chem.*, 1998, 121-127.

2 S. Araki, Y. Wanibe, F. Uno, A. Morikawa, K. Yamamoto, K. Chiba and Y. Butsugan, *Chem. Ber.*, 1993, **126**, 1149-1155.

3 D. L. Boger, R. S. Coleman and J. S. Panek, *J. Org. Chem.*,1985, **50**, 5377-5379.

4 J. J. Zhang and G. B. Schuster, *J. Am. Chem. Soc.*,1989, **111**, 7149-7155.

5 S. Araki, H. Hattori, K. Ogawa, M. Kuzuya, T. Inoue, H. Yamamura and M. Kawai, *J. Chem. Soc., Perkin Trans. 1*, 2001, 2476-2482.
